# Supplementary material for: Cardiovascular Disease-Associated MicroRNA Dysregulation during the First Trimester of Gestation in Women with Chronic Hypertension and Normotensive Women Subsequently Developing Gestational Hypertension or Preeclampsia with or without Fetal Growth Restriction
Source: MDPI journal article supplement (doi:10.3390/biomedicines10020256), 2022-01-25
Supplement: s1 [file s1]

Supplementary Figure S2.

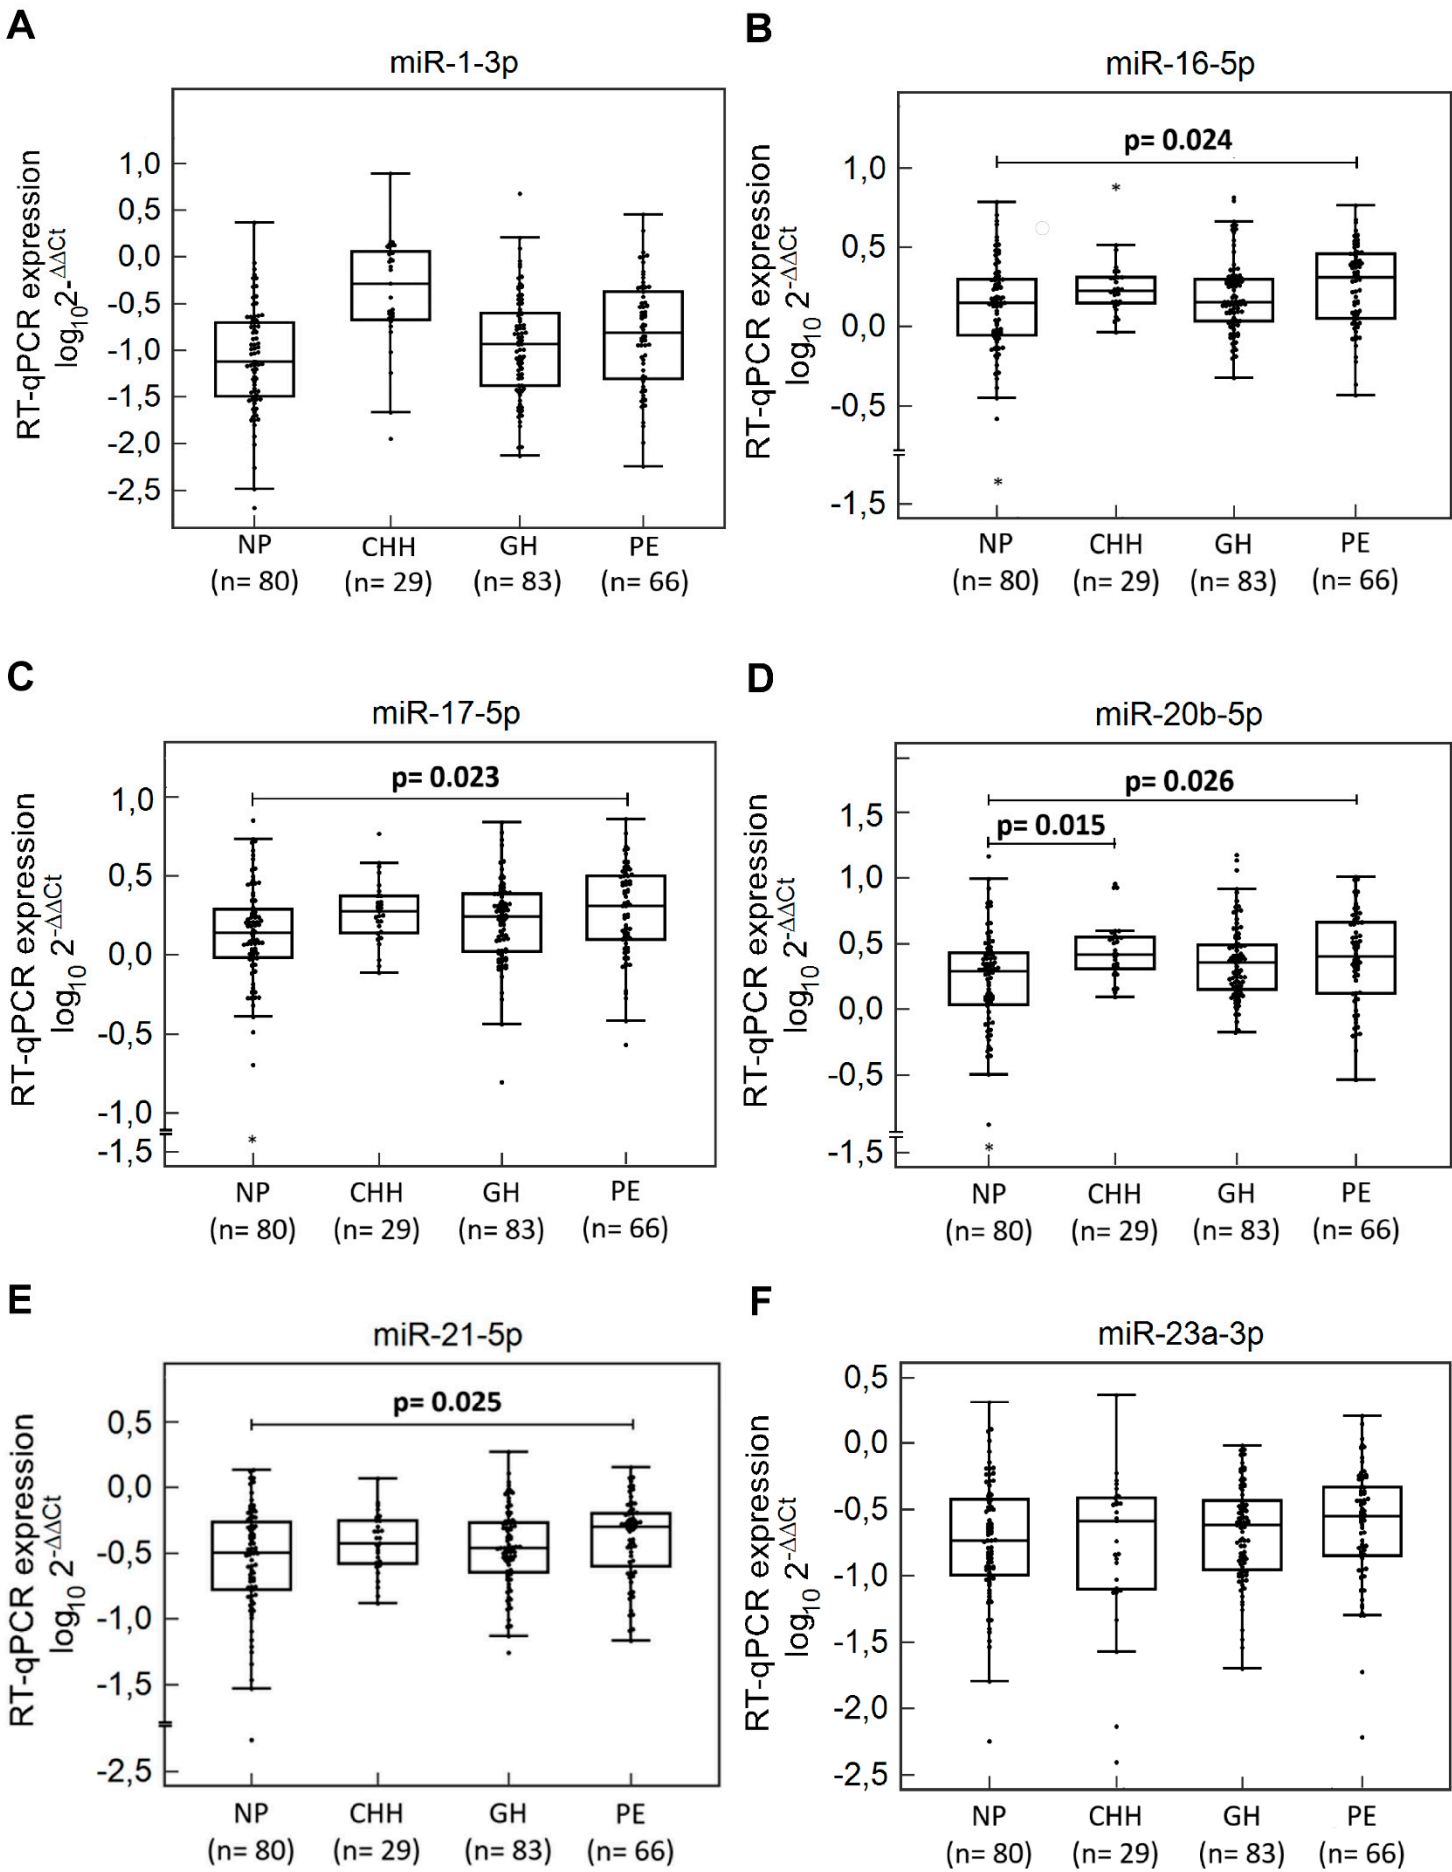

**G**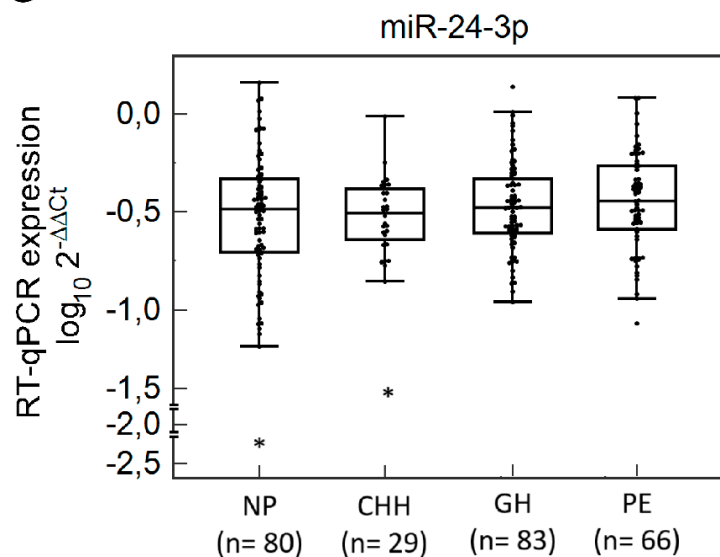**H**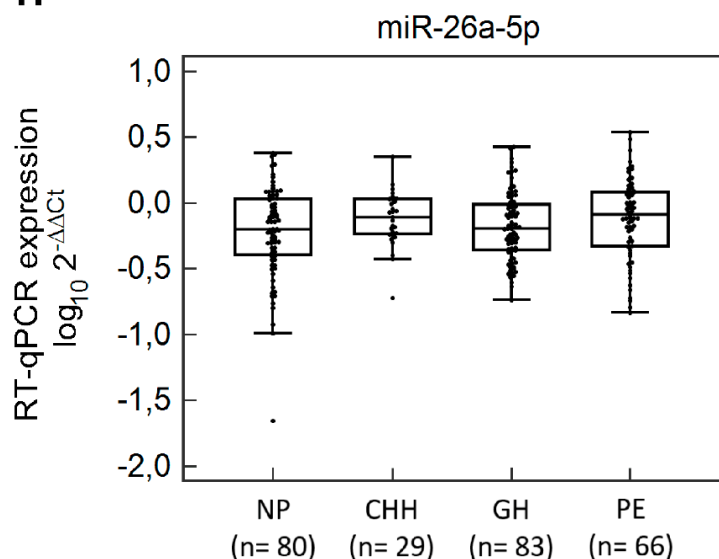**I**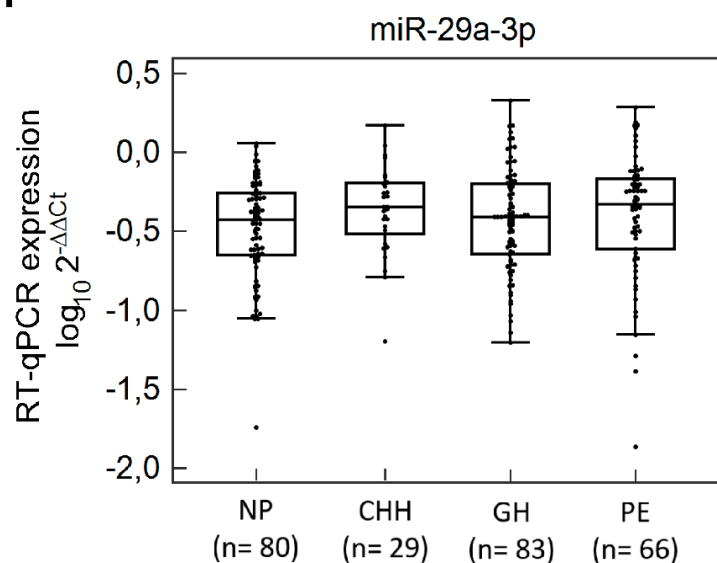**J**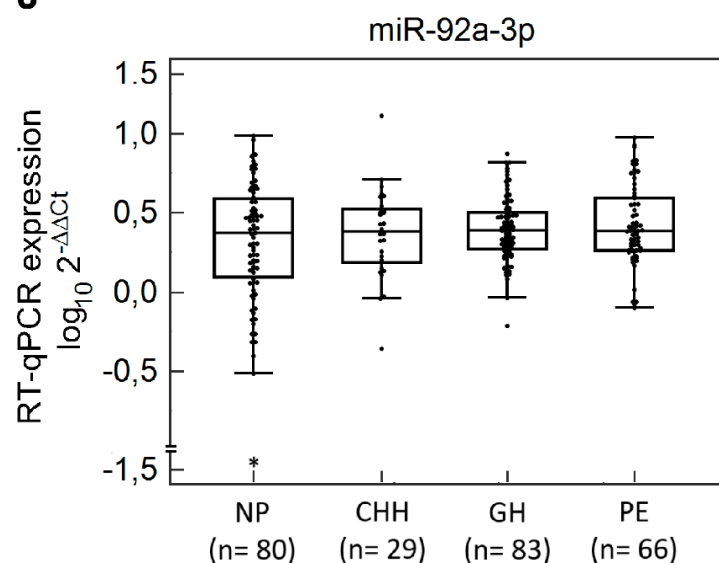**K**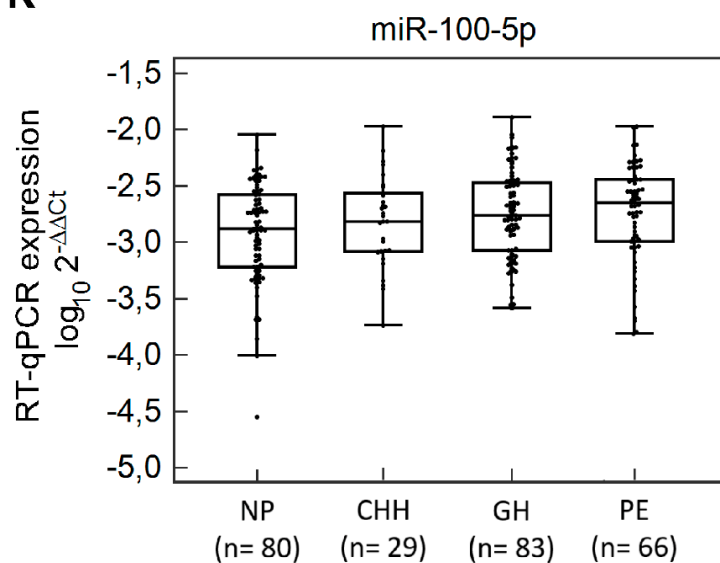**L**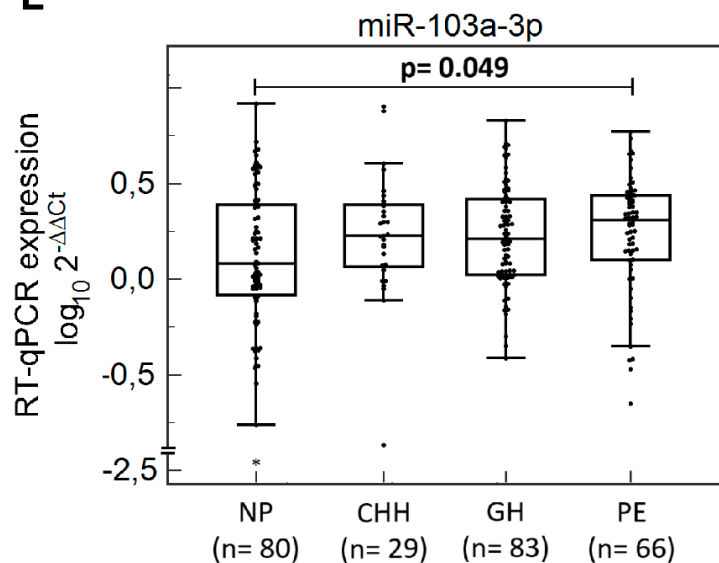

**M**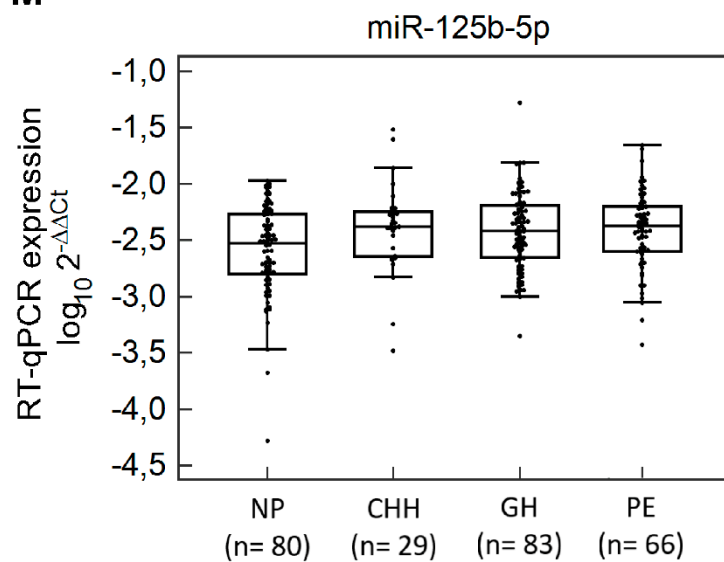**N**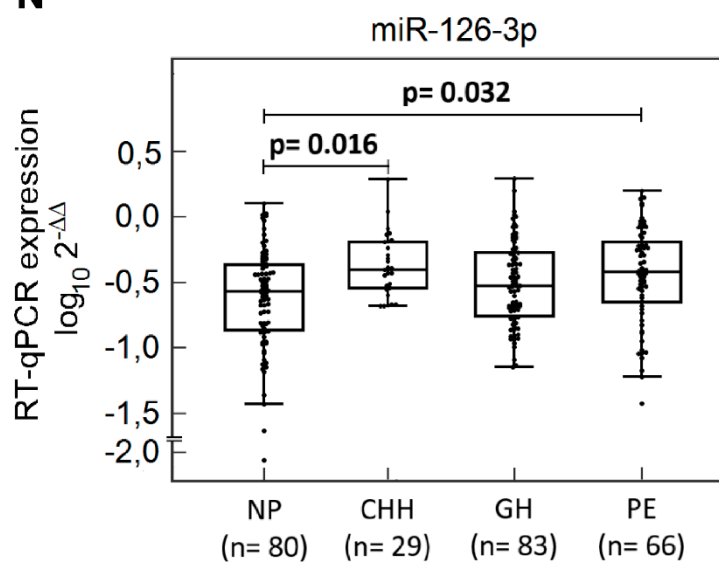**O**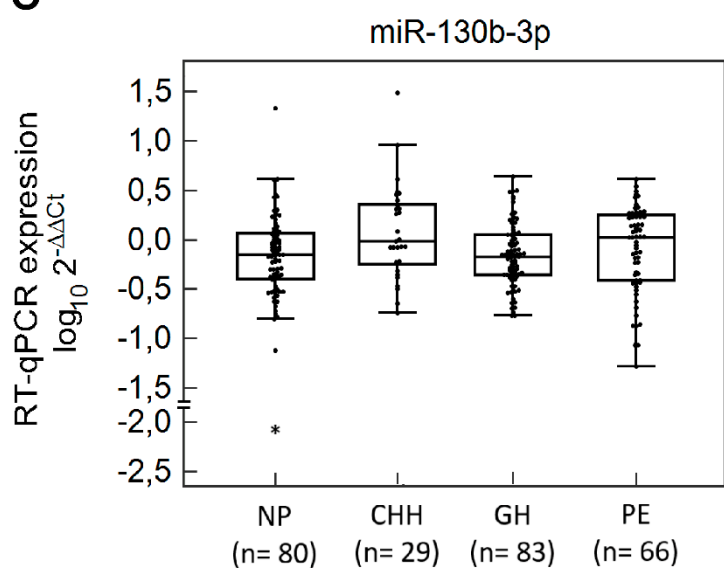**P**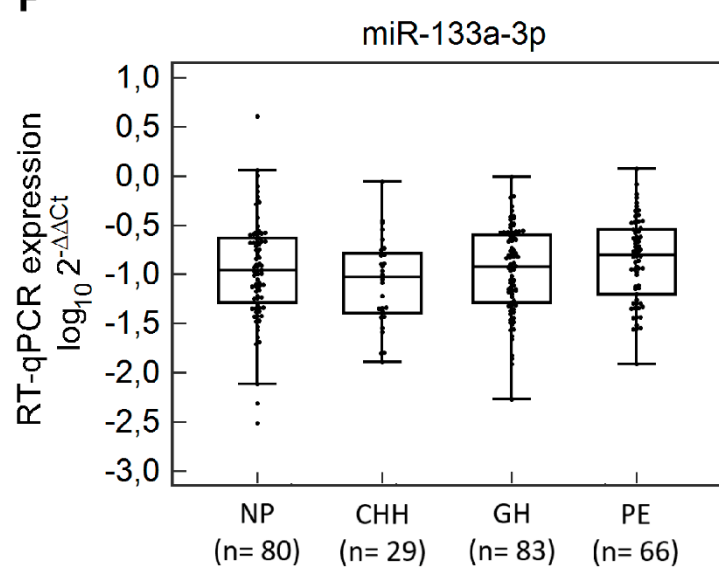**Q**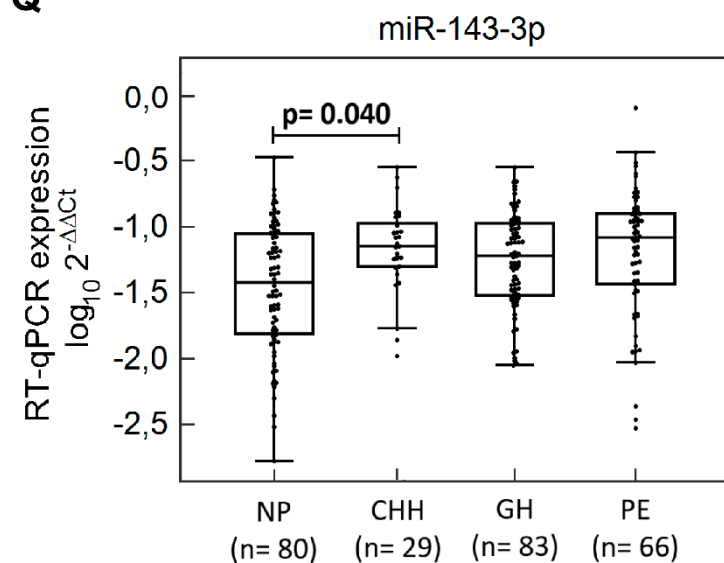**R**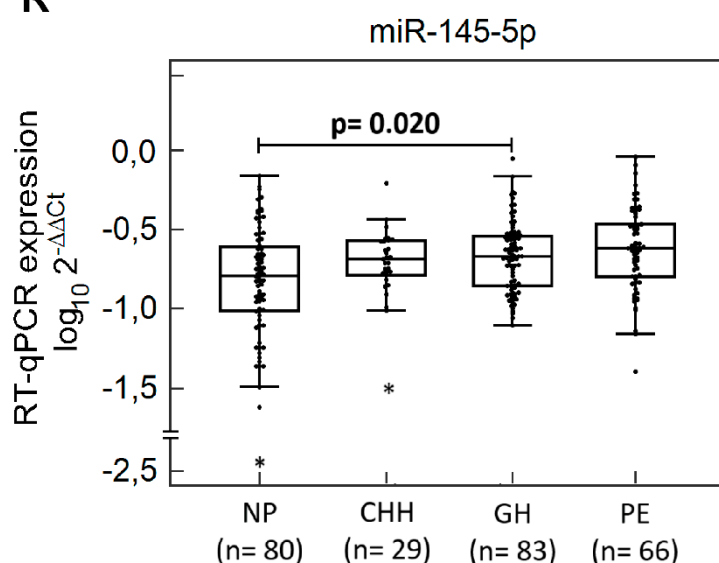

**S**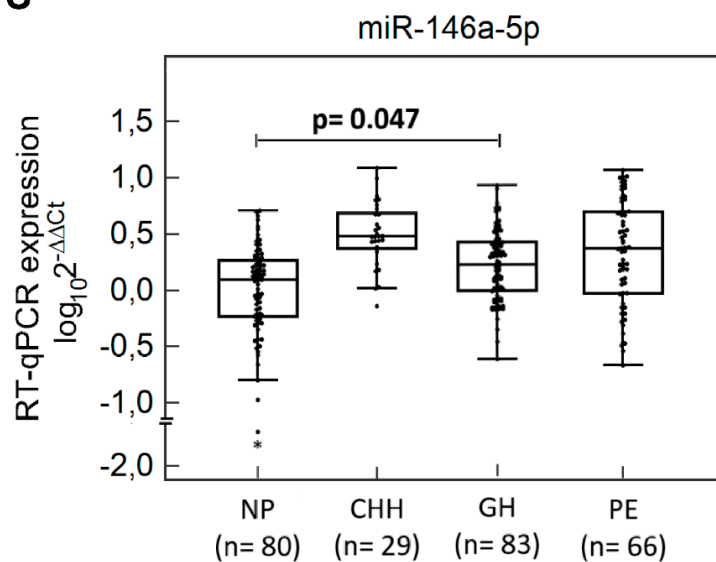**T**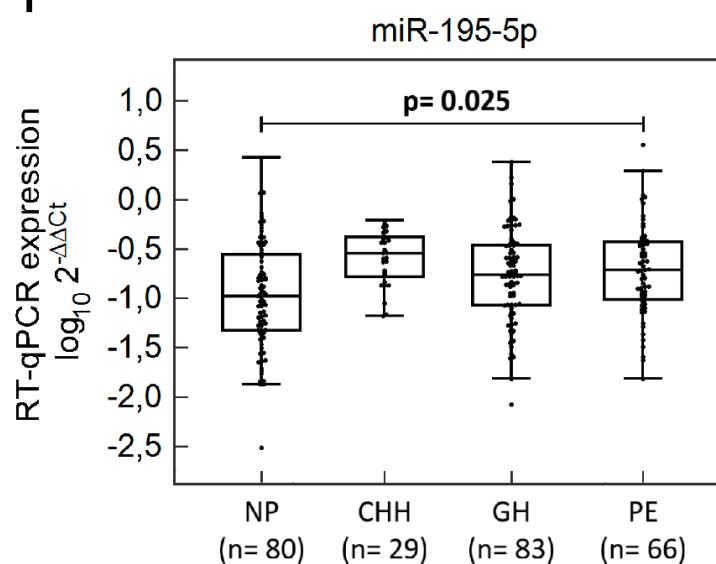**U**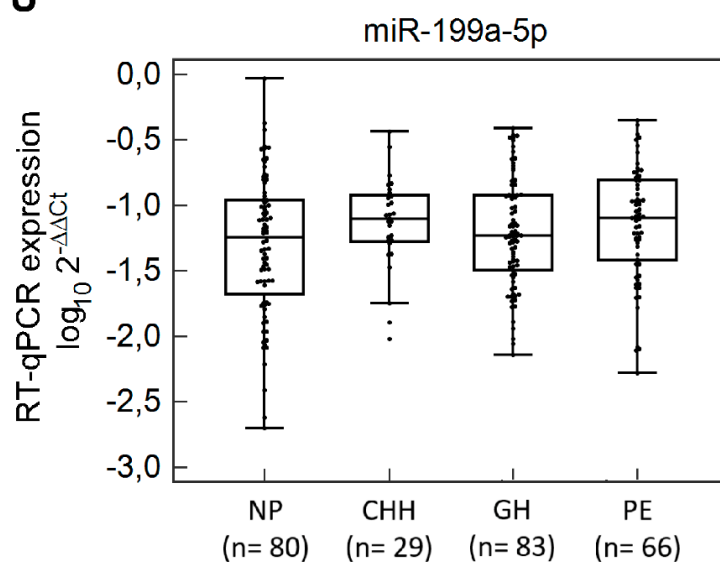**V**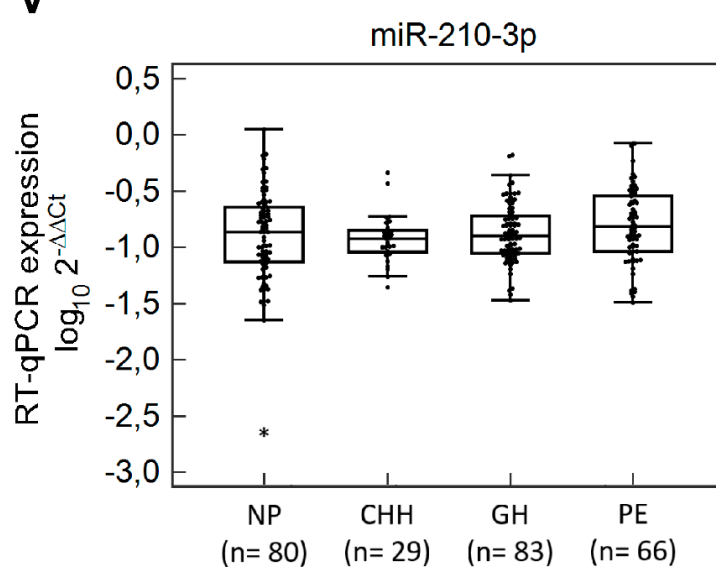**W**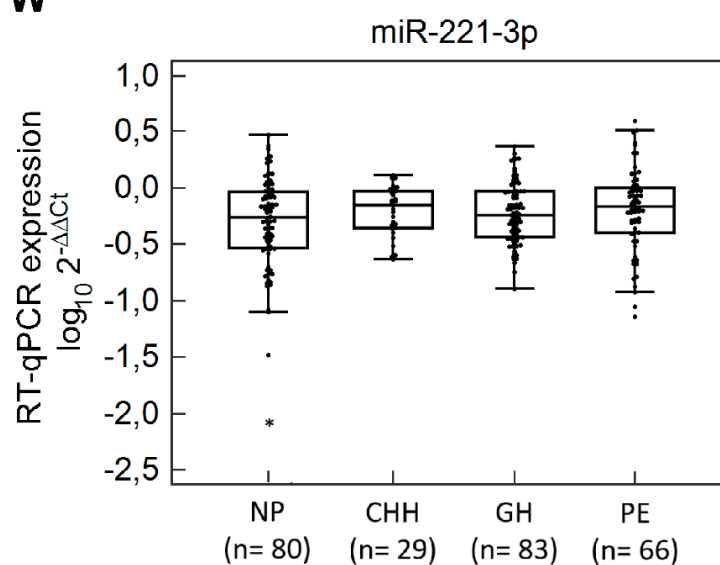**X**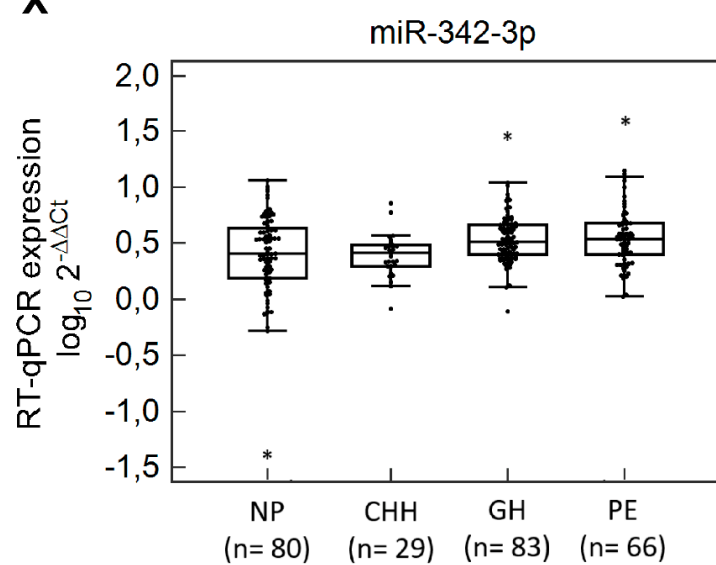

Y

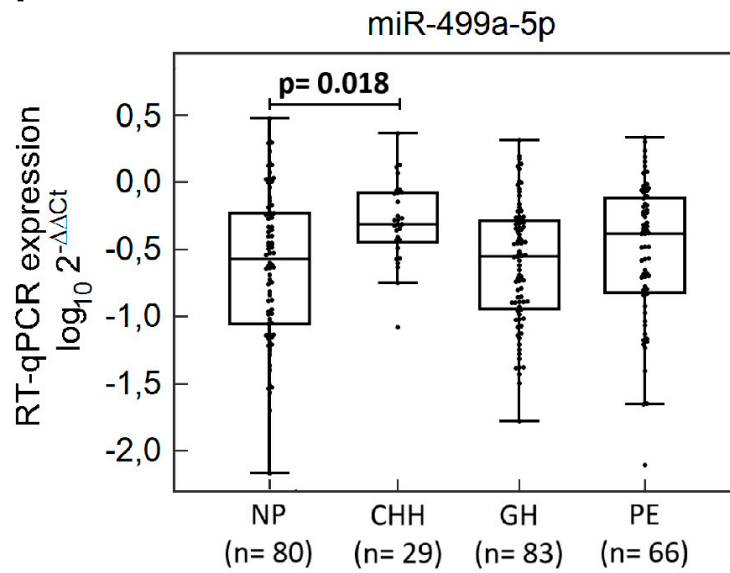

**Supplementary Figure S2.** Gene expression of cardiovascular disease associated microRNAs in peripheral blood leukocytes in early stages of gestation – comparison between NP, CHH, GH and PE – statistical non-significant data after Benjamini-Hochberg correction.; NP, normal pregnancies; CHH, chronic hypertension; GH, gestational hypertension; PE, preeclampsia.
