# Supplementary material for: Cardiovascular Disease-Associated MicroRNA Dysregulation during the First Trimester of Gestation in Women with Chronic Hypertension and Normotensive Women Subsequently Developing Gestational Hypertension or Preeclampsia with or without Fetal Growth Restriction
Source: MDPI journal article supplement (doi:10.3390/biomedicines10020256), 2022-01-25
Supplement: s1 [file s1]

**Supplementary Table S2.** Correlation between microRNA gene expression and serum PAPP-A levels.

| microRNA gene expression<br>vs serum PAPP-A levels |      | $\rho$<br>(Spearman's rank correlation coefficient) | p-value  |
|----------------------------------------------------|------|-----------------------------------------------------|----------|
| miR-1-3p & PAPP-A                                  | IU/l | 0.090534                                            | 0.148619 |
|                                                    | MoM  | 0.029266                                            | 0.642493 |
| miR-16-5p & PAPP-A                                 | IU/l | -0.043601                                           | 0.487352 |
|                                                    | MoM  | -0.129991                                           | 0.038425 |
| miR-17-5p & PAPP-A                                 | IU/l | -0.058893                                           | 0.347992 |
|                                                    | MoM  | -0.093929                                           | 0.135461 |
| miR-20a-5p & PAPP-A                                | IU/l | -0.030766                                           | 0.624158 |
|                                                    | MoM  | -0.111785                                           | 0.075345 |
| miR-20b-5p & PAPP-A                                | IU/l | 0.019215                                            | 0.759637 |
|                                                    | MoM  | -0.052504                                           | 0.404715 |
| miR-21-5p & PAPP-A                                 | IU/l | -0.053628                                           | 0.392845 |
|                                                    | MoM  | -0.098825                                           | 0.116161 |
| miR-23a-3p & PAPP-A                                | IU/l | -0.038479                                           | 0.539954 |
|                                                    | MoM  | -0.088769                                           | 0.158379 |
| miR-24-3p & PAPP-A                                 | IU/l | -0.072049                                           | 0.250709 |
|                                                    | MoM  | -0.097069                                           | 0.122822 |
| miR-26a-5p & PAPP-A                                | IU/l | -0.007499                                           | 0.904957 |
|                                                    | MoM  | -0.076819                                           | 0.222446 |
| miR-29a-3p & PAPP-A                                | IU/l | -0.006683                                           | 0.915263 |
|                                                    | MoM  | -0.068365                                           | 0.277724 |
| miR-92a-3p & PAPP-A                                | IU/l | -0.125936                                           | 0.044100 |
|                                                    | MoM  | -0.073608                                           | 0.242436 |
| miR-100-5p & PAPP-A                                | IU/l | 0.048187                                            | 0.442687 |
|                                                    | MoM  | -0.055604                                           | 0.377510 |
| miR-103a-3p & PAPP-A                               | IU/l | -0.095912                                           | 0.125863 |
|                                                    | MoM  | -0.083404                                           | 0.185173 |
| miR-125b-5p & PAPP-A                               | IU/l | 0.013652                                            | 0.827920 |
|                                                    | MoM  | -0.050310                                           | 0.424659 |
| miR-126-3p & PAPP-A                                | IU/l | -0.068324                                           | 0.276105 |
|                                                    | MoM  | -0.103916                                           | 0.098442 |
| miR-130b-3p & PAPP-A                               | IU/l | -0.007467                                           | 0.905358 |
|                                                    | MoM  | -0.028999                                           | 0.645522 |
| miR-133a-3p & PAPP-A                               | IU/l | 0.023851                                            | 0.704097 |
|                                                    | MoM  | 0.002056                                            | 0.973990 |
| miR-143-3p & PAPP-A                                | IU/l | -0.009320                                           | 0.882033 |
|                                                    | MoM  | -0.090433                                           | 0.150687 |
| miR-145-5p & PAPP-A                                | IU/l | -0.081073                                           | 0.196028 |
|                                                    | MoM  | -0.079603                                           | 0.206079 |
| miR-146a-5p & PAPP-A                               | IU/l | -0.066113                                           | 0.291979 |
|                                                    | MoM  | -0.126657                                           | 0.043722 |
| miR-155-5p & PAPP-A                                | IU/l | -0.074334                                           | 0.235956 |
|                                                    | MoM  | -0.142412                                           | 0.023203 |
| miR-181a-5p & PAPP-A                               | IU/l | -0.011164                                           | 0.858912 |
|                                                    | MoM  | -0.091416                                           | 0.146283 |
| miR-195-5p & PAPP-A                                | IU/l | -0.001733                                           | 0.977986 |
|                                                    | MoM  | -0.047339                                           | 0.452559 |

|                      |      |           |          |
|----------------------|------|-----------|----------|
| miR-199a-5p & PAPP-A | IU/l | 0.021752  | 0.729069 |
|                      | MoM  | -0.016877 | 0.788961 |
| miR-210-3p & PAPP-A  | IU/l | -0.091753 | 0.143206 |
|                      | MoM  | -0.124836 | 0.046864 |
| miR-221-3p & PAPP-A  | IU/l | -0.077747 | 0.215072 |
|                      | MoM  | -0.135854 | 0.030424 |
| miR-342-3p & PAPP-A  | IU/l | -0.052063 | 0.406825 |
|                      | MoM  | -0.051201 | 0.416492 |
| miR-499a-5p & PAPP-A | IU/l | 0.028203  | 0.653342 |
|                      | MoM  | -0.056869 | 0.366741 |
| miR-574-3p & PAPP-A  | IU/l | -0.001684 | 0.978604 |
|                      | MoM  | -0.039347 | 0.532474 |

PAPP-A, pregnancy-associated plasma protein-A; IU/l, international units per litre; MoM, multiple of median.
