# Supplementary material for: Cardiovascular Disease-Associated MicroRNA Dysregulation during the First Trimester of Gestation in Women with Chronic Hypertension and Normotensive Women Subsequently Developing Gestational Hypertension or Preeclampsia with or without Fetal Growth Restriction
Source: MDPI journal article supplement (doi:10.3390/biomedicines10020256), 2022-01-25
Supplement: s1 [file s1]

A

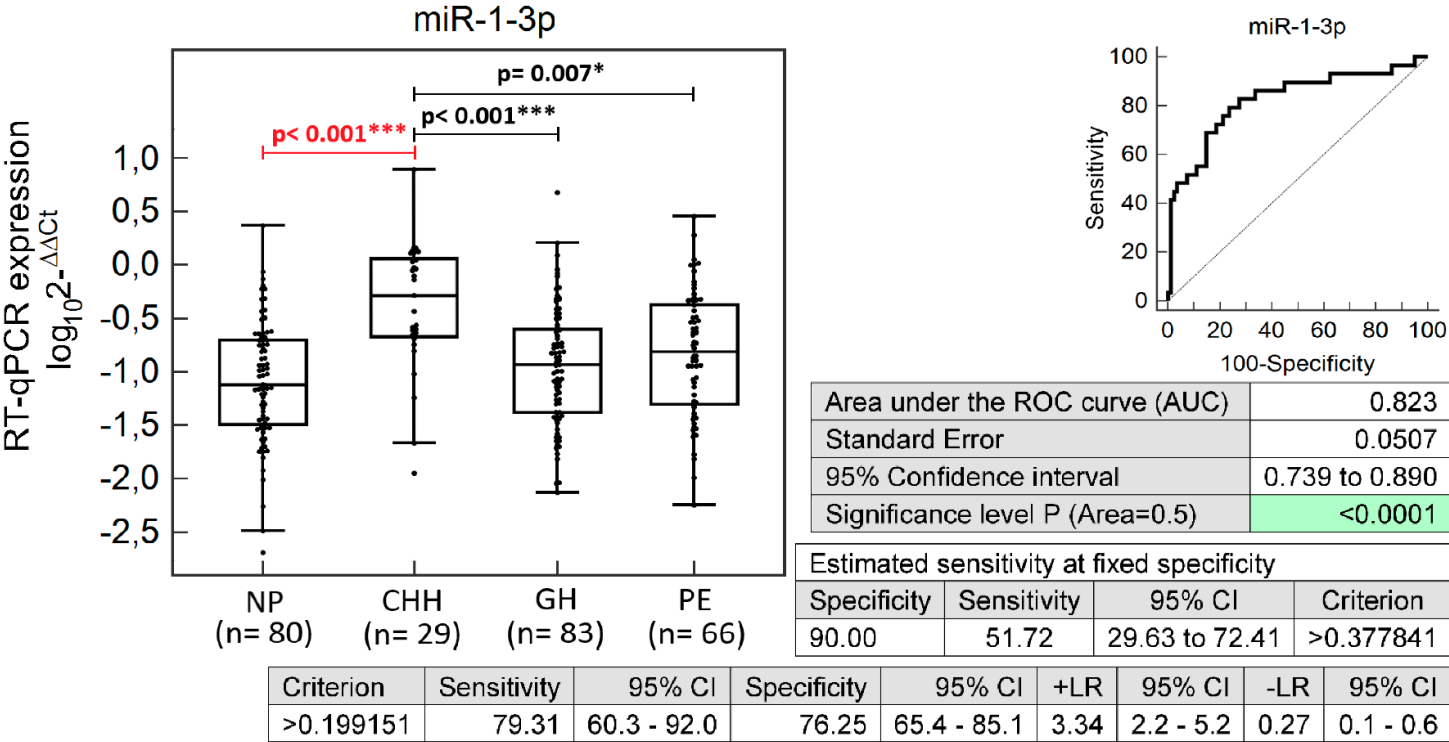

B

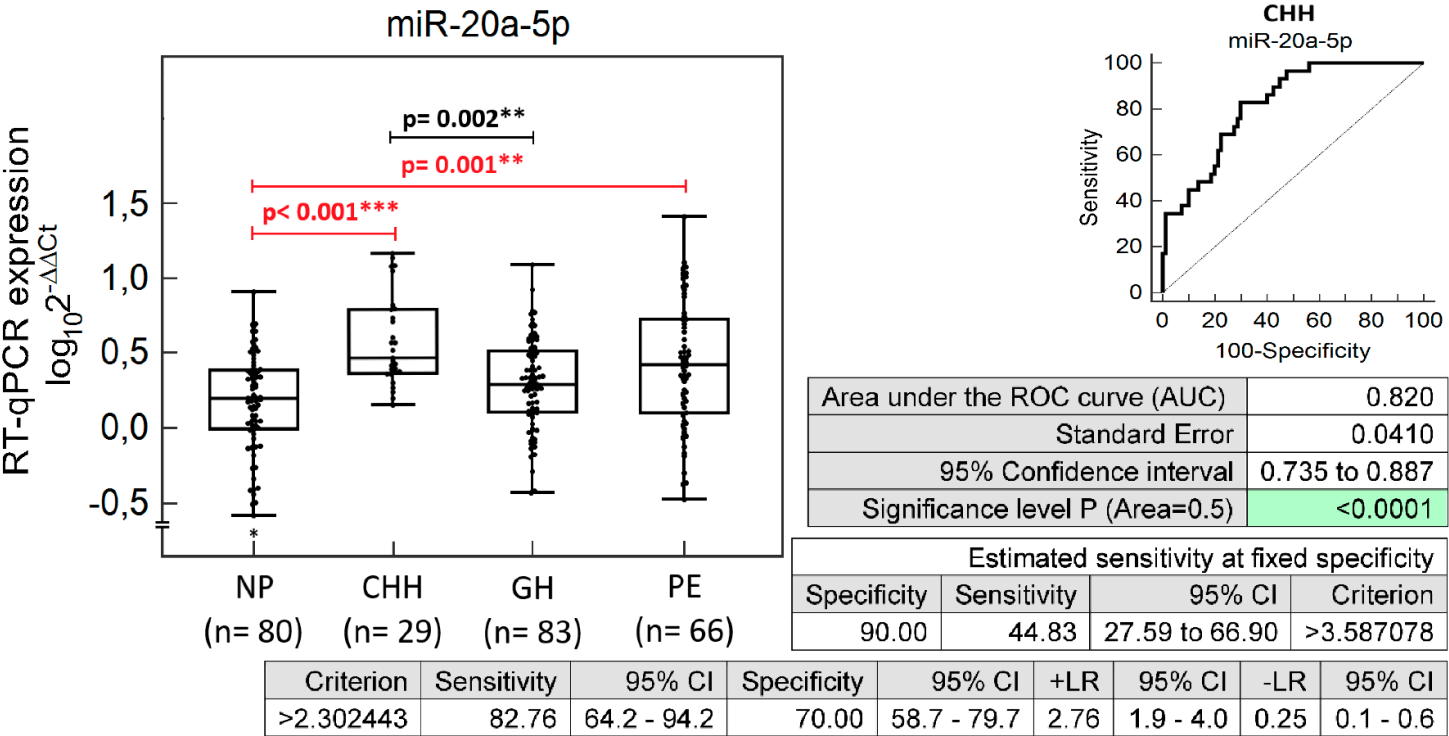

C

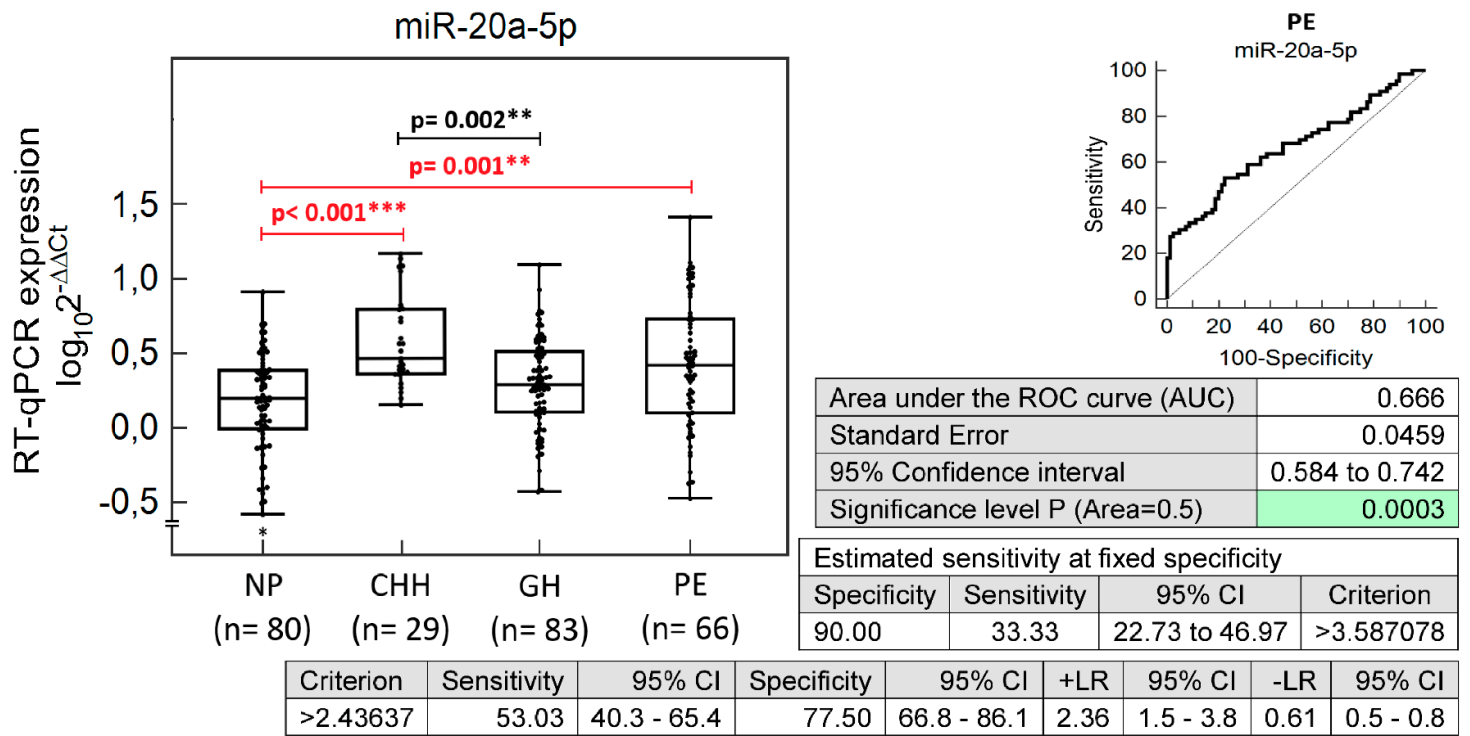

D

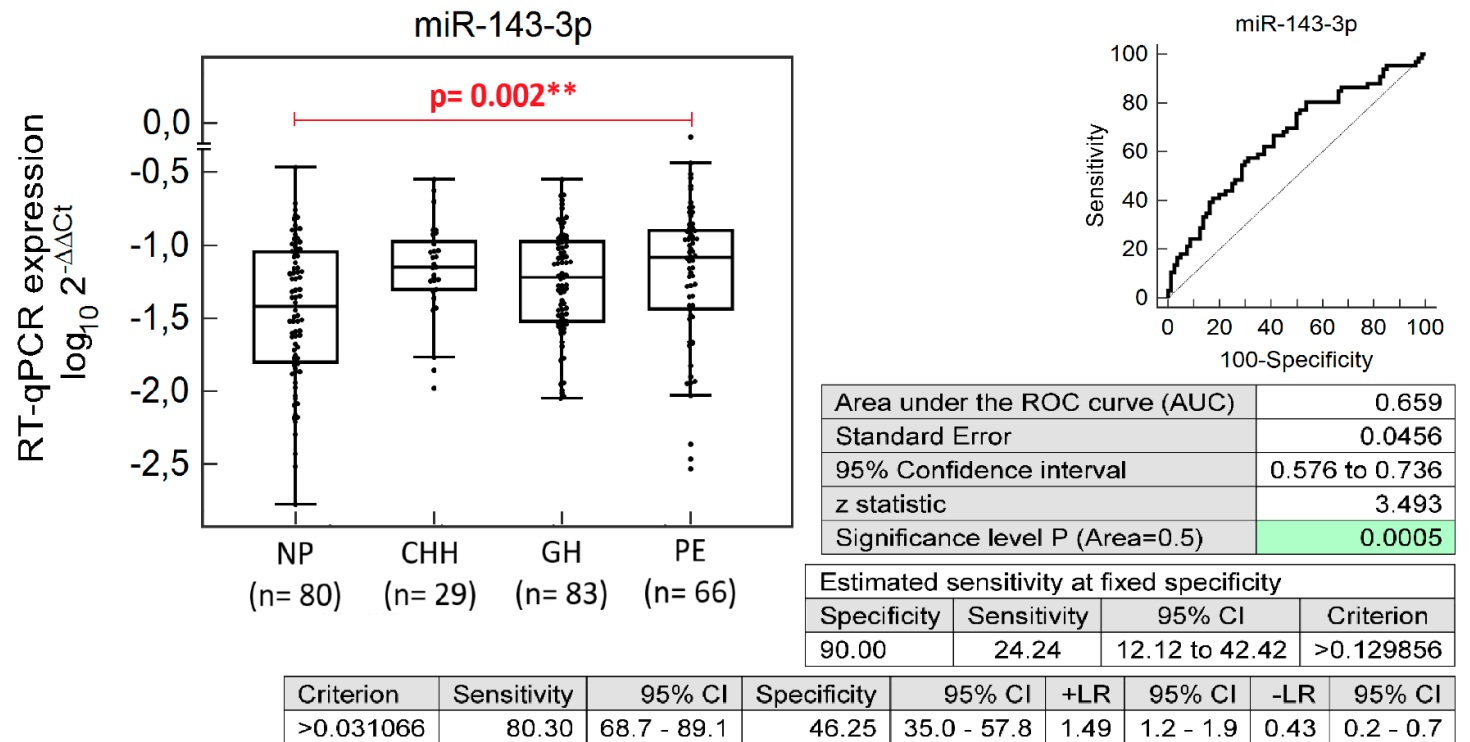

**E**

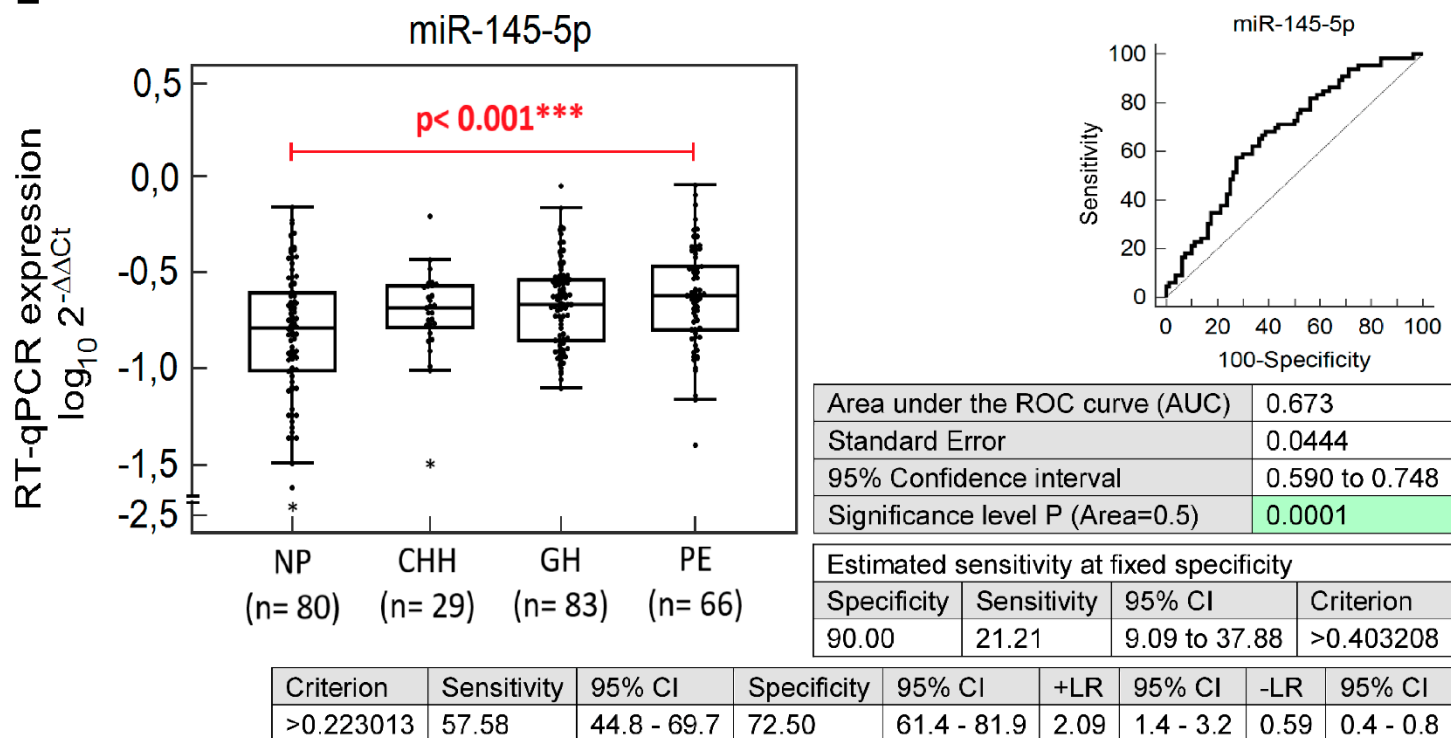

**F**

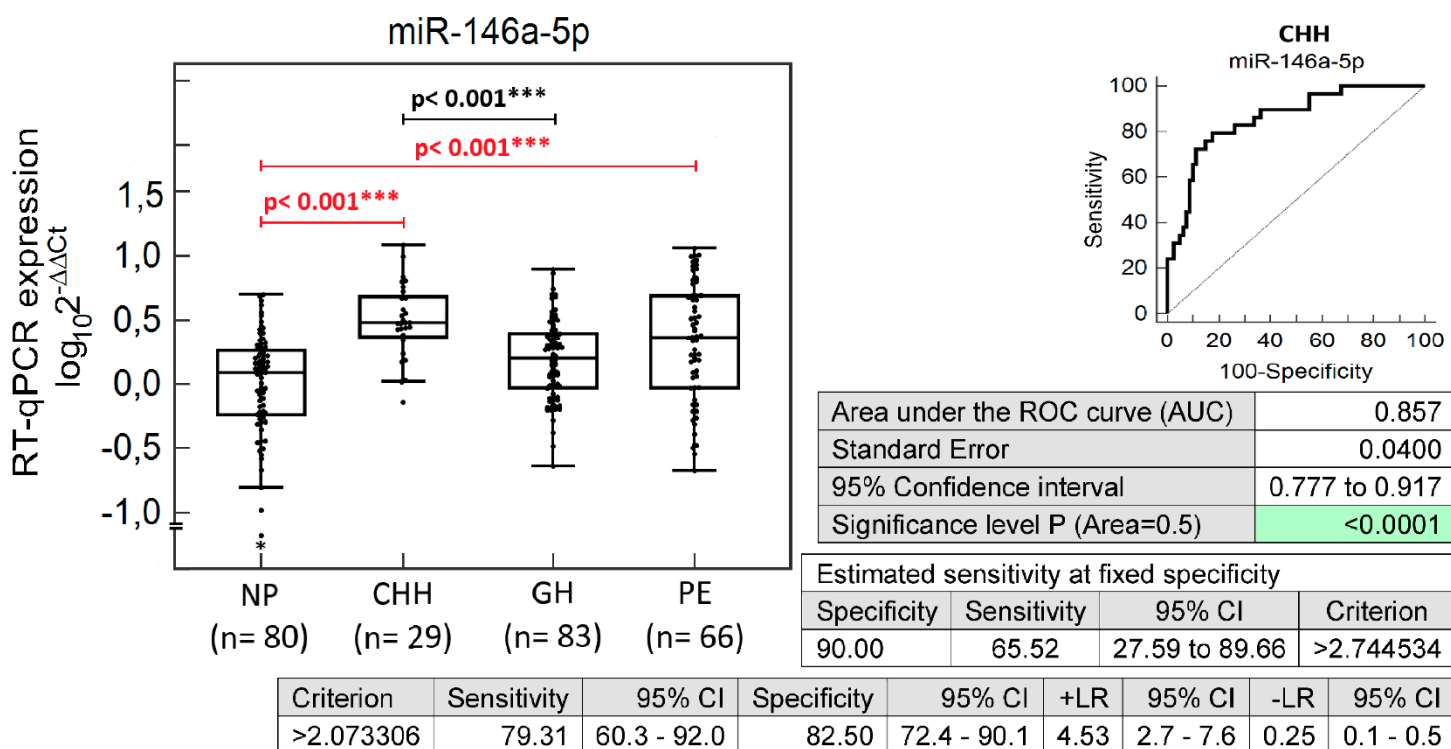

**G**

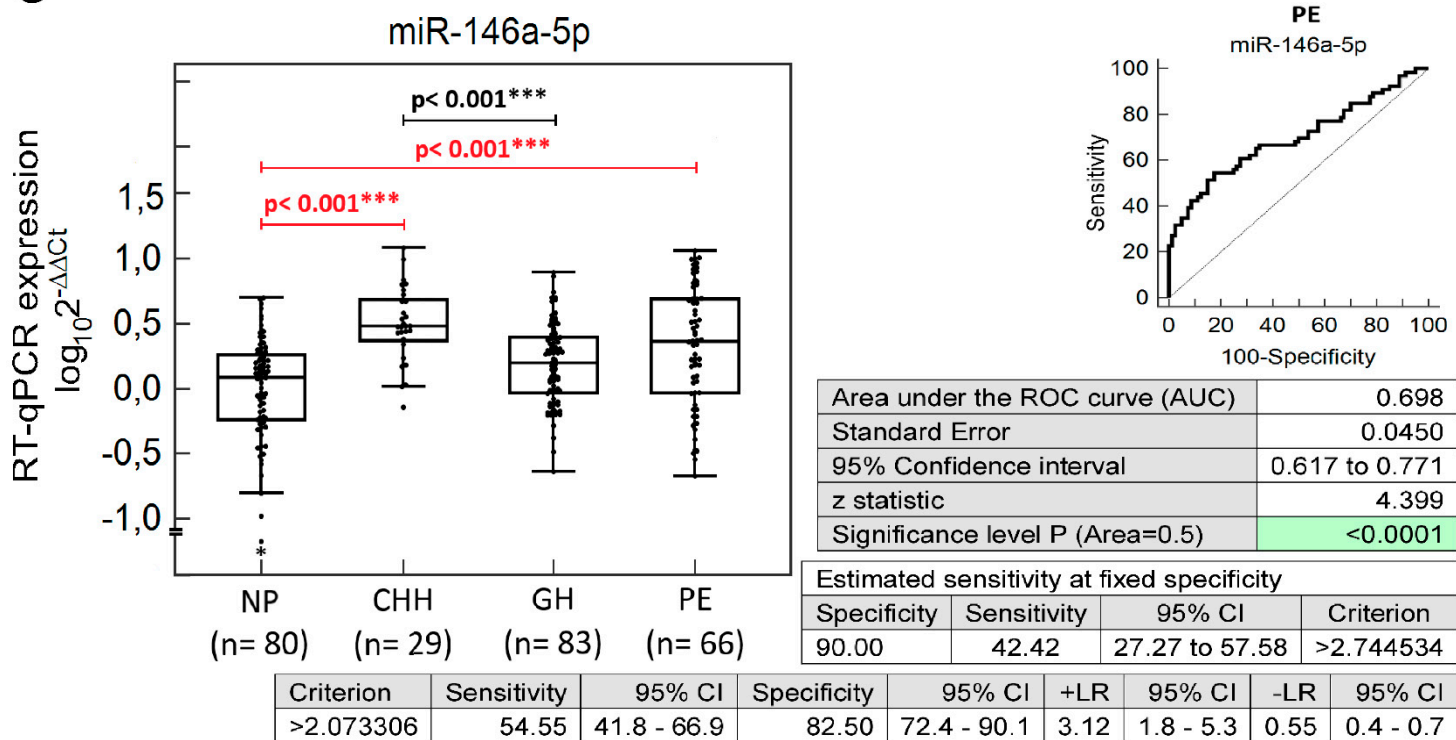

**H**

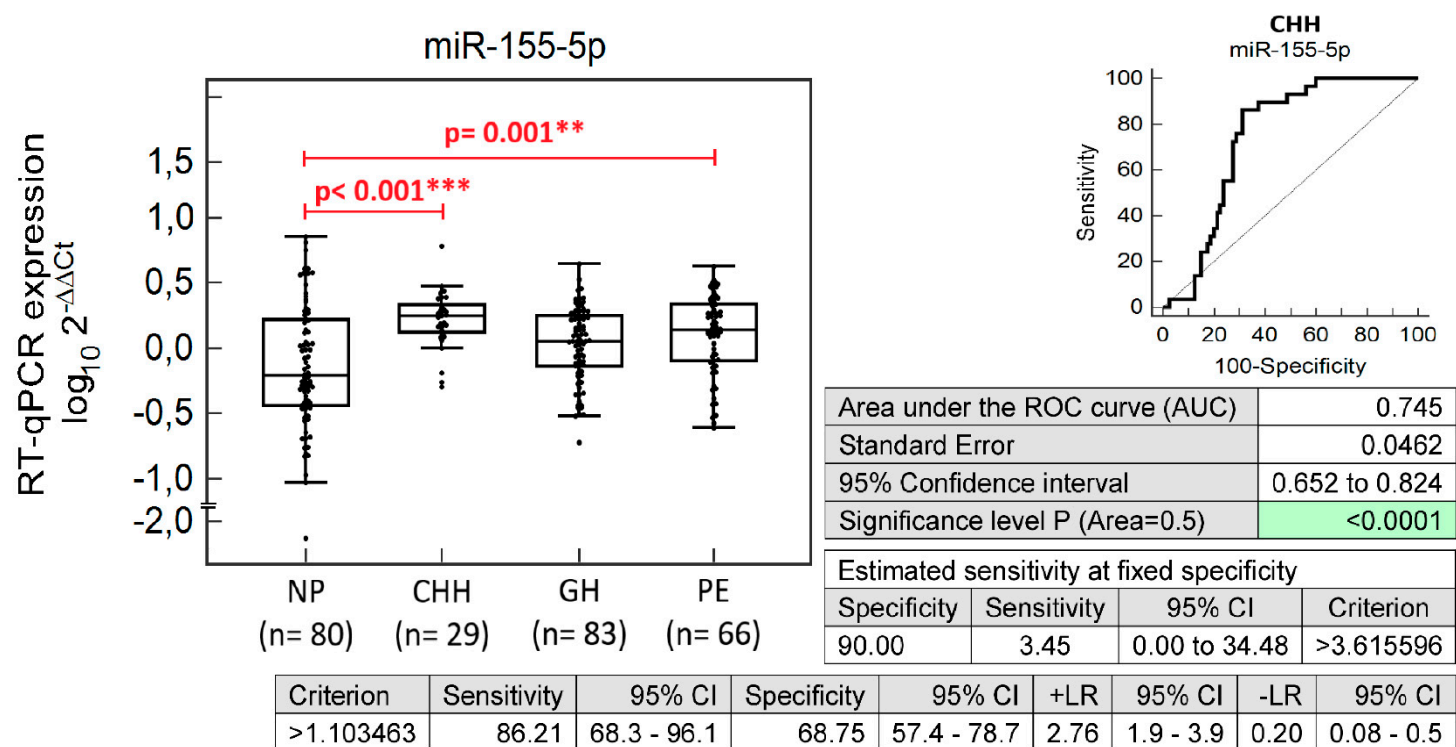

I

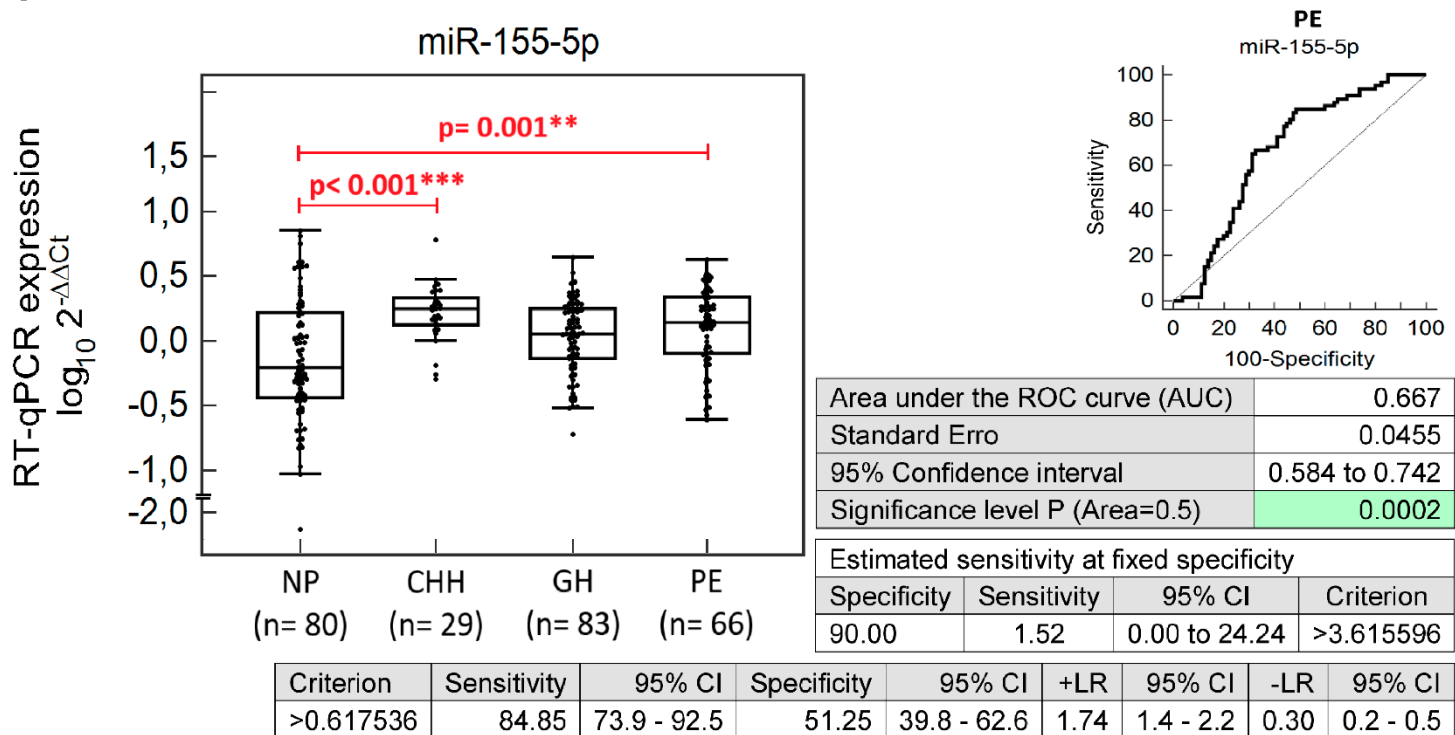

J

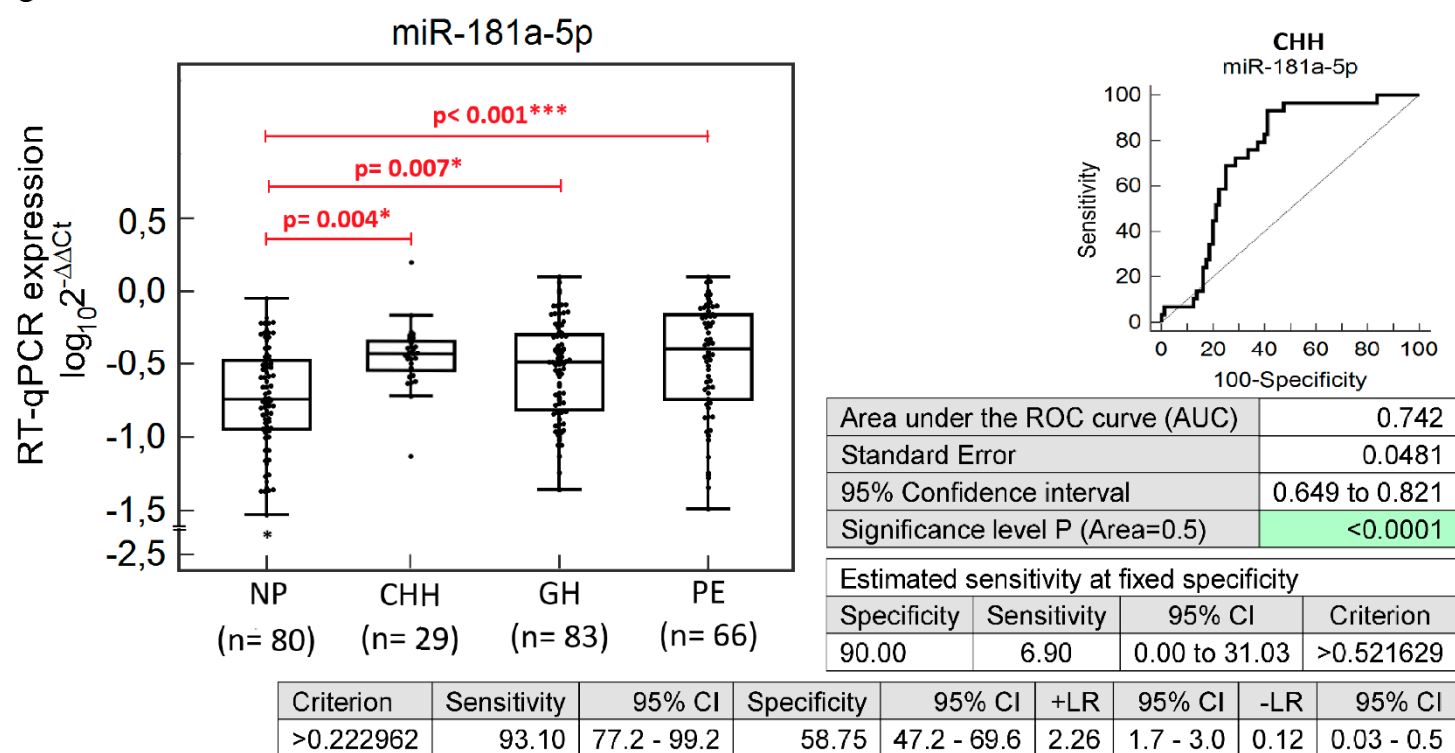

K

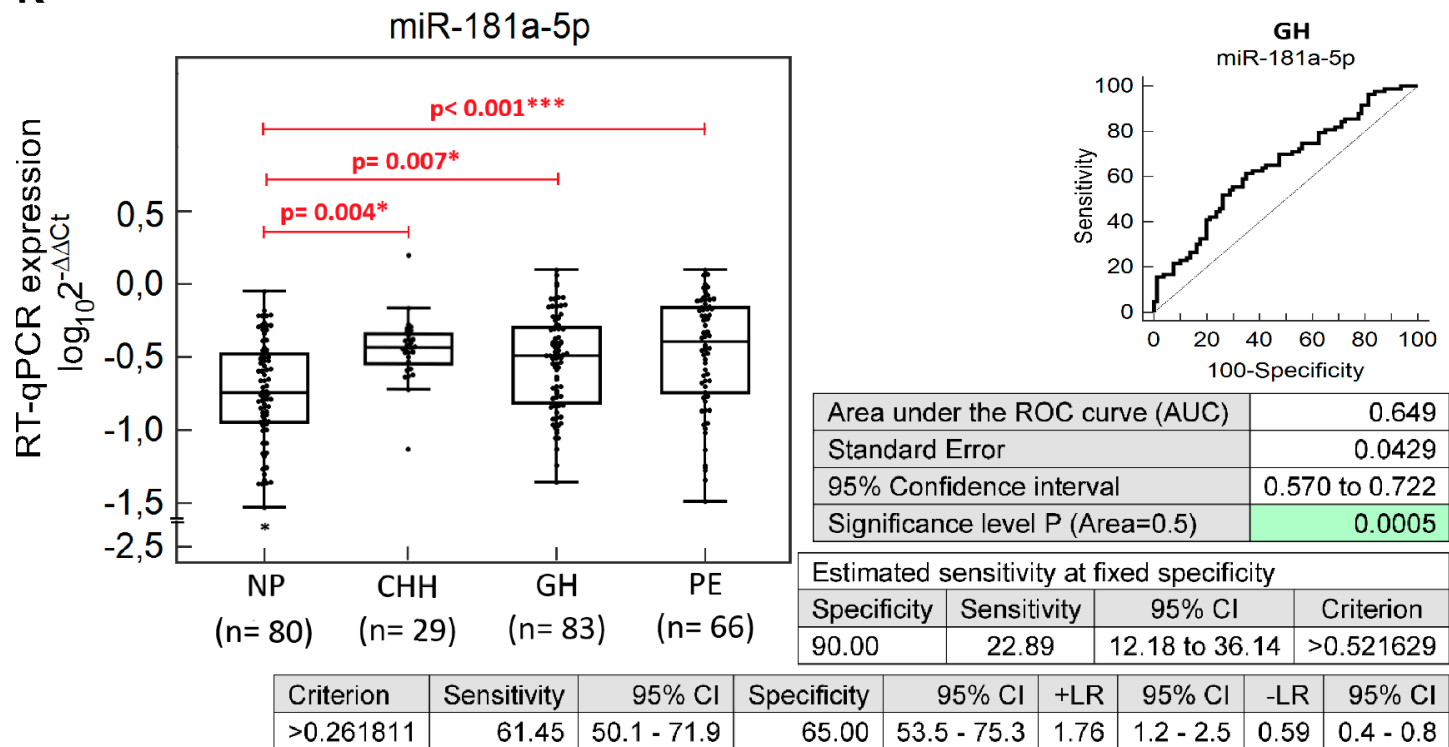

L

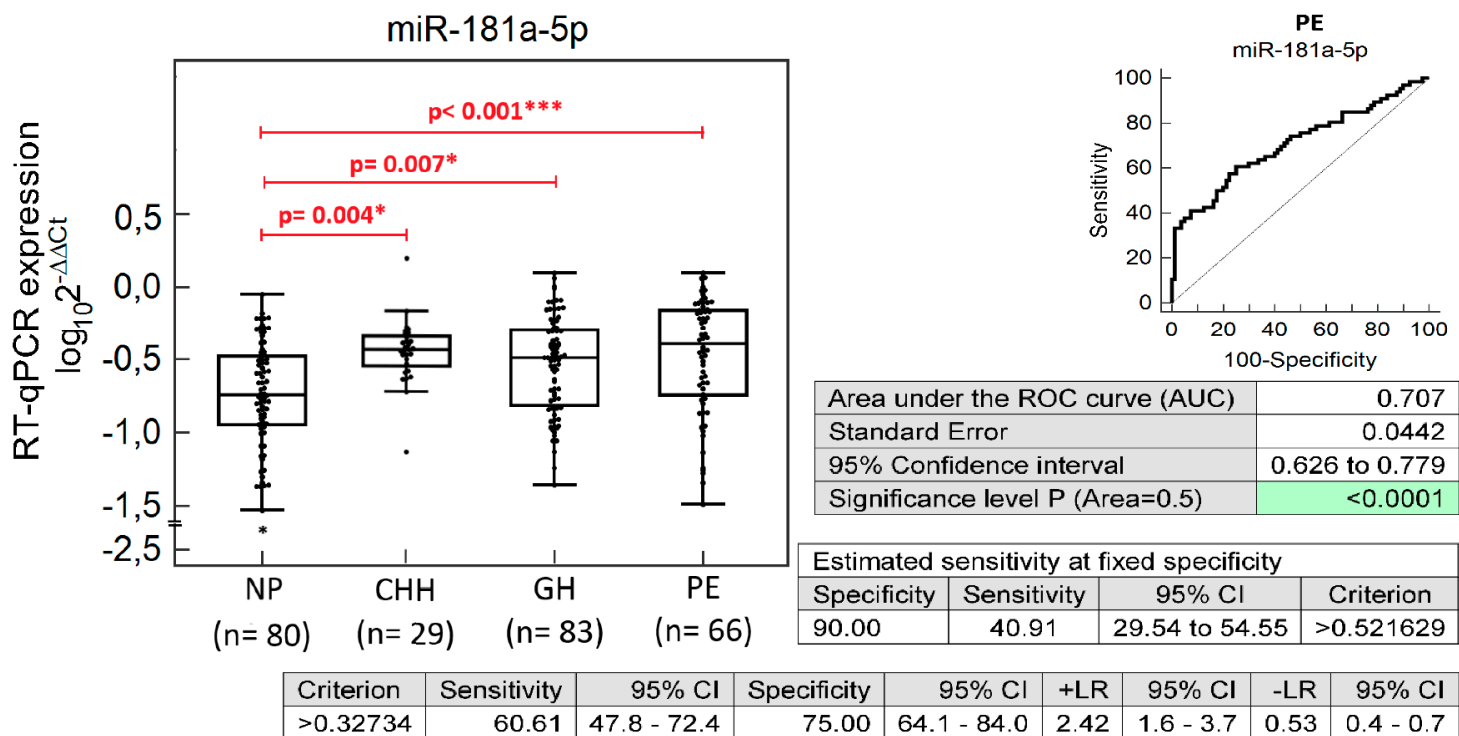

**M**

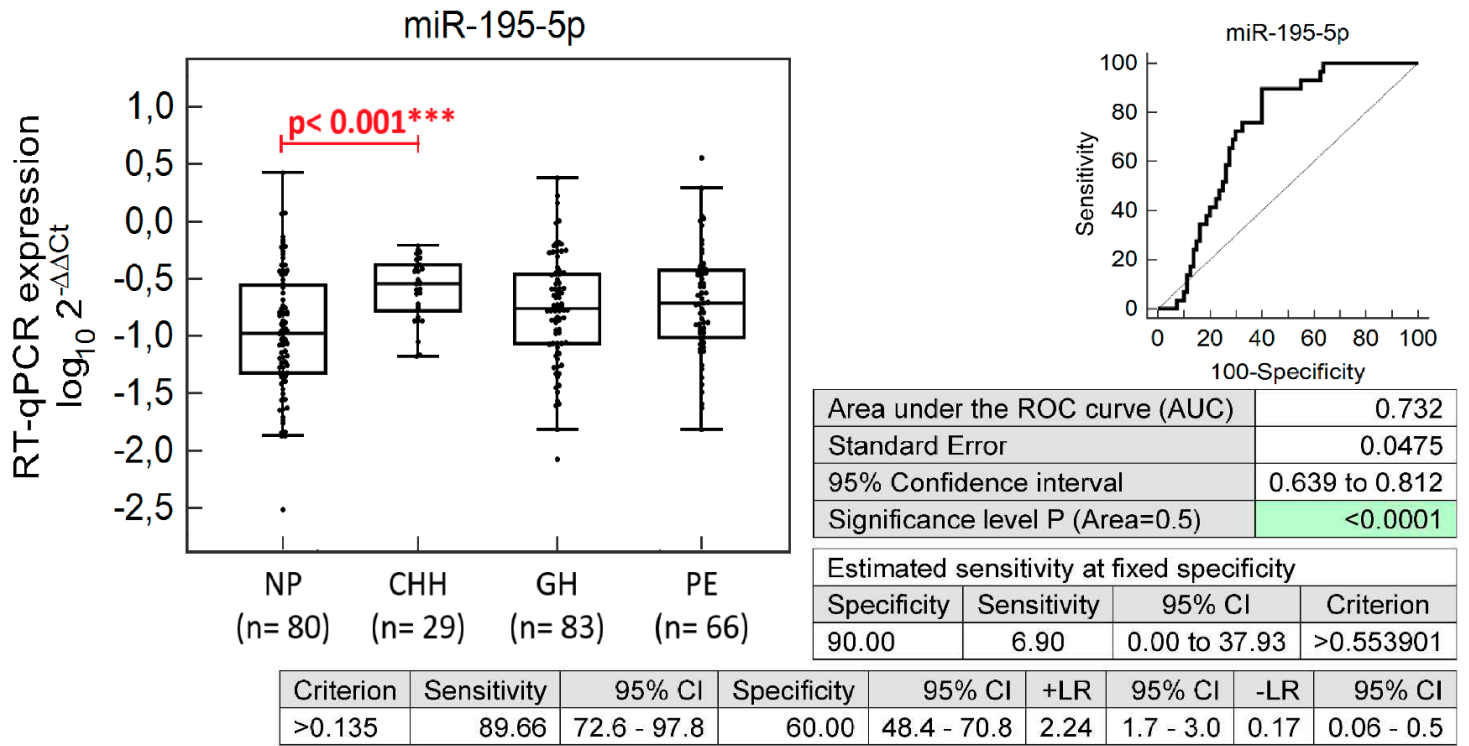

**N**

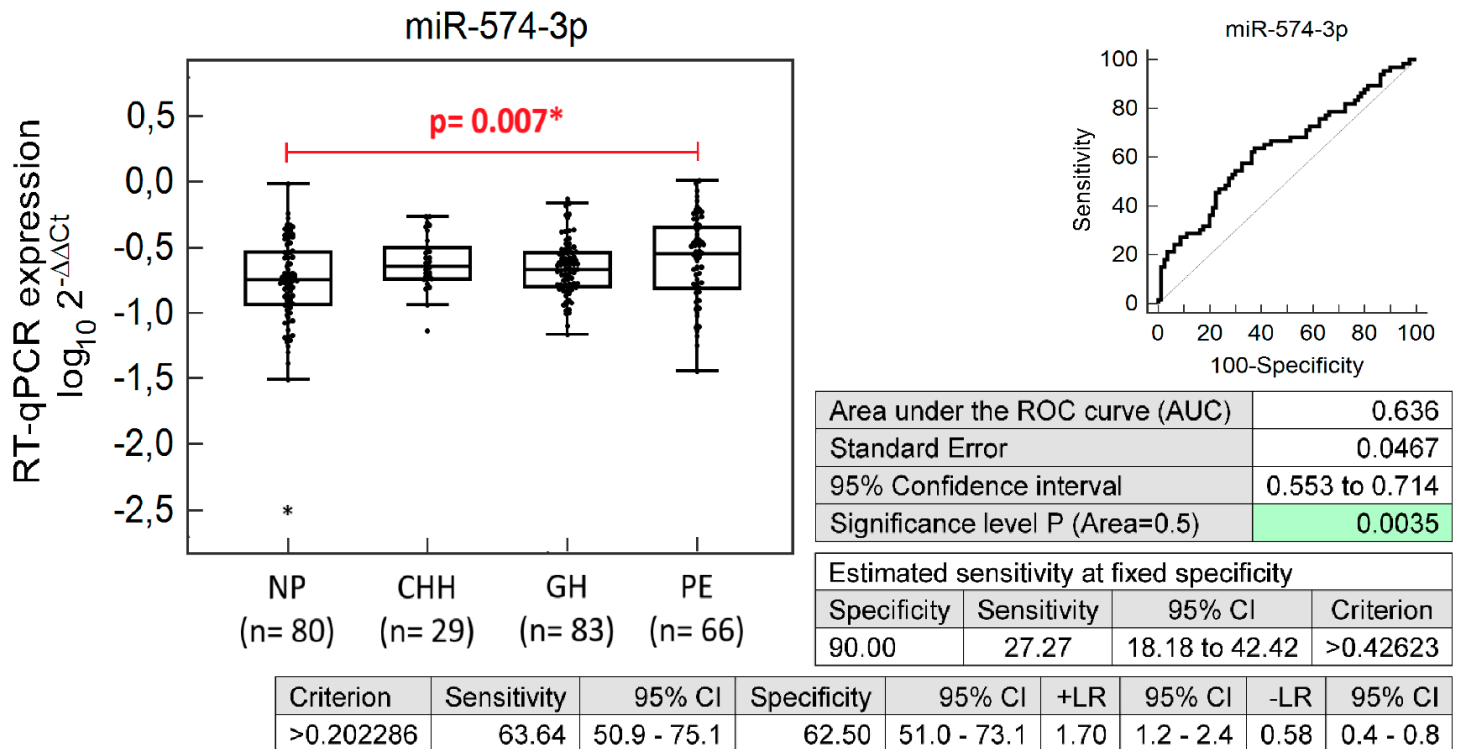

**Supplementary Figure S1.** Gene expression of cardiovascular disease associated microRNAs in peripheral blood leukocytes in early stages of gestation – comparison between NP, CHH, GH and PE – statistical significant data after Benjamini-Hochberg correction (results after the Benjamini-Hochberg correction are marked by \* for  $\alpha = 0.05$ , \*\* for  $\alpha = 0.01$ , and \*\*\* for  $\alpha = 0.001$ ). NP, normal pregnancies; CHH, chronic hypertension; GH, gestational hypertension; PE, preeclampsia.
