# Supplementary material for: Cardiovascular Disease-Associated MicroRNA Dysregulation during the First Trimester of Gestation in Women with Chronic Hypertension and Normotensive Women Subsequently Developing Gestational Hypertension or Preeclampsia with or without Fetal Growth Restriction
Source: MDPI journal article supplement (doi:10.3390/biomedicines10020256), 2022-01-25
Supplement: s1 [file s1]

**Supplementary Table S1.** Correlation between microRNA gene expression and MAP.

| microRNA gene expression vs MAP |      | $\rho$<br>(Spearman's rank correlation coefficient) | p-value  |
|---------------------------------|------|-----------------------------------------------------|----------|
| miR-1-3p & MAP                  | mmHg | 0.101181                                            | 0.130244 |
|                                 | MoM  | 0.109305                                            | 0.102748 |
| miR-16-5p & MAP                 | mmHg | 0.127920                                            | 0.055367 |
|                                 | MoM  | 0.110396                                            | 0.099342 |
| miR-17-5p & MAP                 | mmHg | 0.100534                                            | 0.132732 |
|                                 | MoM  | 0.056719                                            | 0.398213 |
| miR-20a-5p & MAP                | mmHg | 0.151779                                            | 0.022774 |
|                                 | MoM  | 0.101216                                            | 0.130974 |
| miR-20b-5p & MAP                | mmHg | 0.083715                                            | 0.210960 |
|                                 | MoM  | 0.045465                                            | 0.498402 |
| miR-21-5p & MAP                 | mmHg | 0.115902                                            | 0.082794 |
|                                 | MoM  | 0.082704                                            | 0.217580 |
| miR-23a-3p & MAP                | mmHg | 0.106067                                            | 0.112599 |
|                                 | MoM  | 0.085340                                            | 0.203222 |
| miR-24-3p & MAP                 | mmHg | 0.045295                                            | 0.499044 |
|                                 | MoM  | -0.006524                                           | 0.922644 |
| miR-26a-5p & MAP                | mmHg | 0.085429                                            | 0.201734 |
|                                 | MoM  | 0.052511                                            | 0.434182 |
| miR-29a-3p & MAP                | mmHg | 0.093901                                            | 0.160386 |
|                                 | MoM  | 0.040103                                            | 0.550452 |
| miR-92a-3p & MAP                | mmHg | 0.067669                                            | 0.312234 |
|                                 | MoM  | 0.041251                                            | 0.539088 |
| miR-100-5p & MAP                | mmHg | 0.098287                                            | 0.141656 |
|                                 | MoM  | 0.063888                                            | 0.341195 |
| miR-103a-3p & MAP               | mmHg | 0.132747                                            | 0.046710 |
|                                 | MoM  | 0.094425                                            | 0.158992 |
| miR-125b-5p & MAP               | mmHg | 0.152053                                            | 0.022526 |
|                                 | MoM  | 0.103105                                            | 0.123902 |
| miR-126-3p & MAP                | mmHg | 0.086743                                            | 0.194855 |
|                                 | MoM  | 0.028533                                            | 0.671031 |
| miR-130b-3p & MAP               | mmHg | 0.062253                                            | 0.352631 |
|                                 | MoM  | 0.006059                                            | 0.928151 |
| miR-133a-3p & MAP               | mmHg | -0.006550                                           | 0.922164 |
|                                 | MoM  | -0.032215                                           | 0.631532 |
| miR-143-3p & MAP                | mmHg | 0.155871                                            | 0.019317 |
|                                 | MoM  | 0.106393                                            | 0.112298 |
| miR-145-5p & MAP                | mmHg | 0.154970                                            | 0.020036 |
|                                 | MoM  | 0.081479                                            | 0.224492 |
| miR-146a-5p & MAP               | mmHg | 0.196238                                            | 0.003117 |
|                                 | MoM  | 0.121563                                            | 0.069379 |
| miR-155-5p & MAP                | mmHg | 0.206471                                            | 0.001849 |
|                                 | MoM  | 0.159903                                            | 0.016609 |
| miR-181a-5p & MAP               | mmHg | 0.172207                                            | 0.009651 |
|                                 | MoM  | 0.121533                                            | 0.069446 |
|                                 | mmHg | 0.116547                                            | 0.081085 |

|                   |      |           |          |
|-------------------|------|-----------|----------|
| miR-195-5p & MAP  | MoM  | 0.074968  | 0.263861 |
| miR-199a-5p & MAP | mmHg | 0.066260  | 0.322444 |
|                   | MoM  | 0.032103  | 0.632715 |
| miR-210-3p & MAP  | mmHg | 0.052606  | 0.432310 |
|                   | MoM  | 0.026058  | 0.698100 |
| miR-221-3p & MAP  | mmHg | 0.052716  | 0.431355 |
|                   | MoM  | -0.015395 | 0.818769 |
| miR-342-3p & MAP  | mmHg | 0.120162  | 0.072032 |
|                   | MoM  | 0.036225  | 0.589672 |
| miR-499a-5p & MAP | mmHg | 0.030184  | 0.652468 |
|                   | MoM  | -0.004077 | 0.951619 |
| miR-574-3p & MAP  | mmHg | 0.137673  | 0.039072 |
|                   | MoM  | 0.066085  | 0.324811 |

MAP, mean arterial pressure; mmHg, millimetre of mercury; MoM, multiple of median.
